# Supplementary material
Source: Springer Nature journal article supplement (https://www.springermedizin.de/resource/supplementary/12936_2007_395_MOESM4_ESM.pdf/9547712)

**A**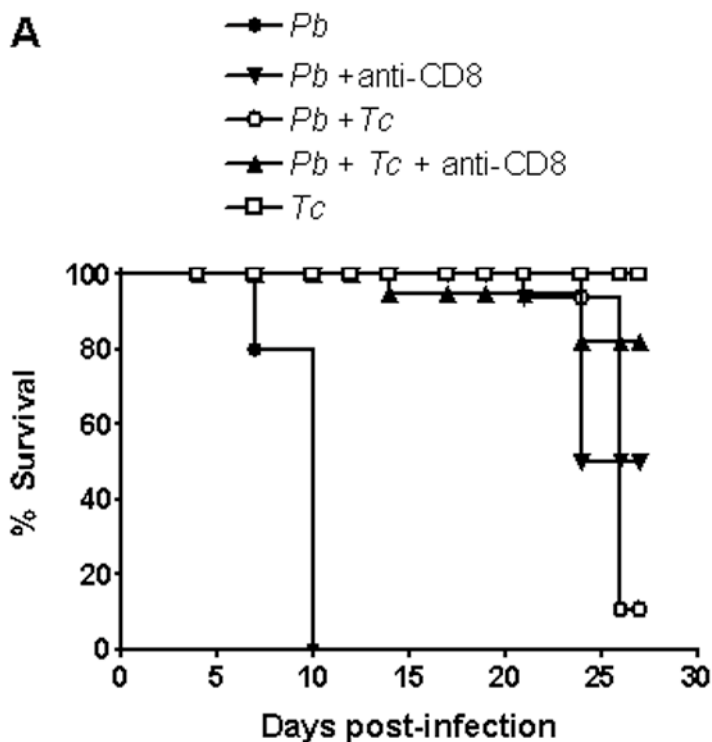**B**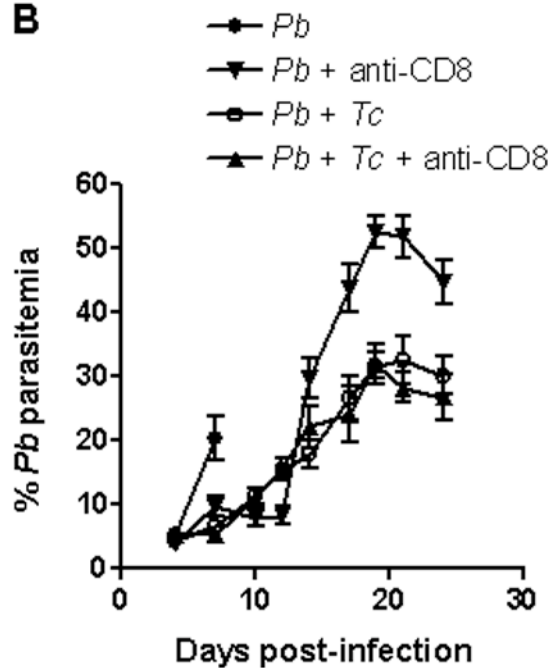

Supplement: MOESM4 [file 9547712]
